# Supplementary material for: Carotid body hyperplasia and enhanced ventilatory responses to hypoxia in mice with heterozygous deficiency of PHD2
Source: PubMed Central journal article supplement (PMC3731614; doi:10.1113/jphysiol.2012.247254), 2013-05-20
Supplement: tjp0591-3565-SD1.pdf [file tjp0591-3565-SD1.pdf]

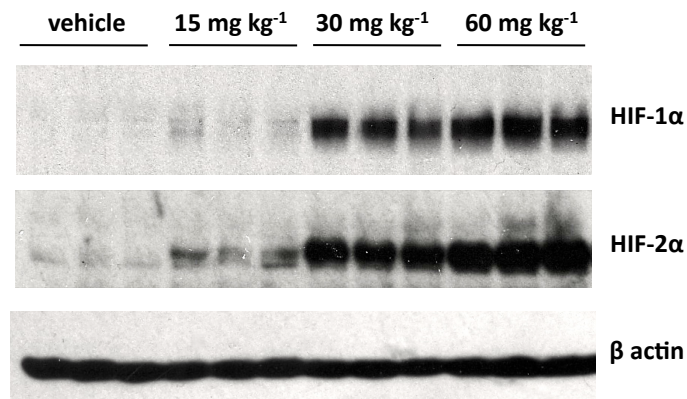

**Supplementary figure 1: Dose-dependent effect of IOX3 on HIF $\alpha$  protein levels in the liver.** IOX3 (or vehicle) was administered to male wild-type C57BL/6 mice by intraperitoneal injection at 15 – 60 mg kg<sup>-1</sup> and livers harvested 1 hr after treatment for immunoblotting with HIF-1 $\alpha$  and HIF-2 $\alpha$  antibodies (Novus Biologicals; PM9) as well as with  $\beta$  actin. HIF-1 $\alpha$  and HIF-2 $\alpha$  induction was near maximal at 30 mg kg<sup>-1</sup>. This dose was chosen for twice daily injections over the 7 day period as the 60 mg kg<sup>-1</sup> dose was not tolerated by mice after multiple injections.

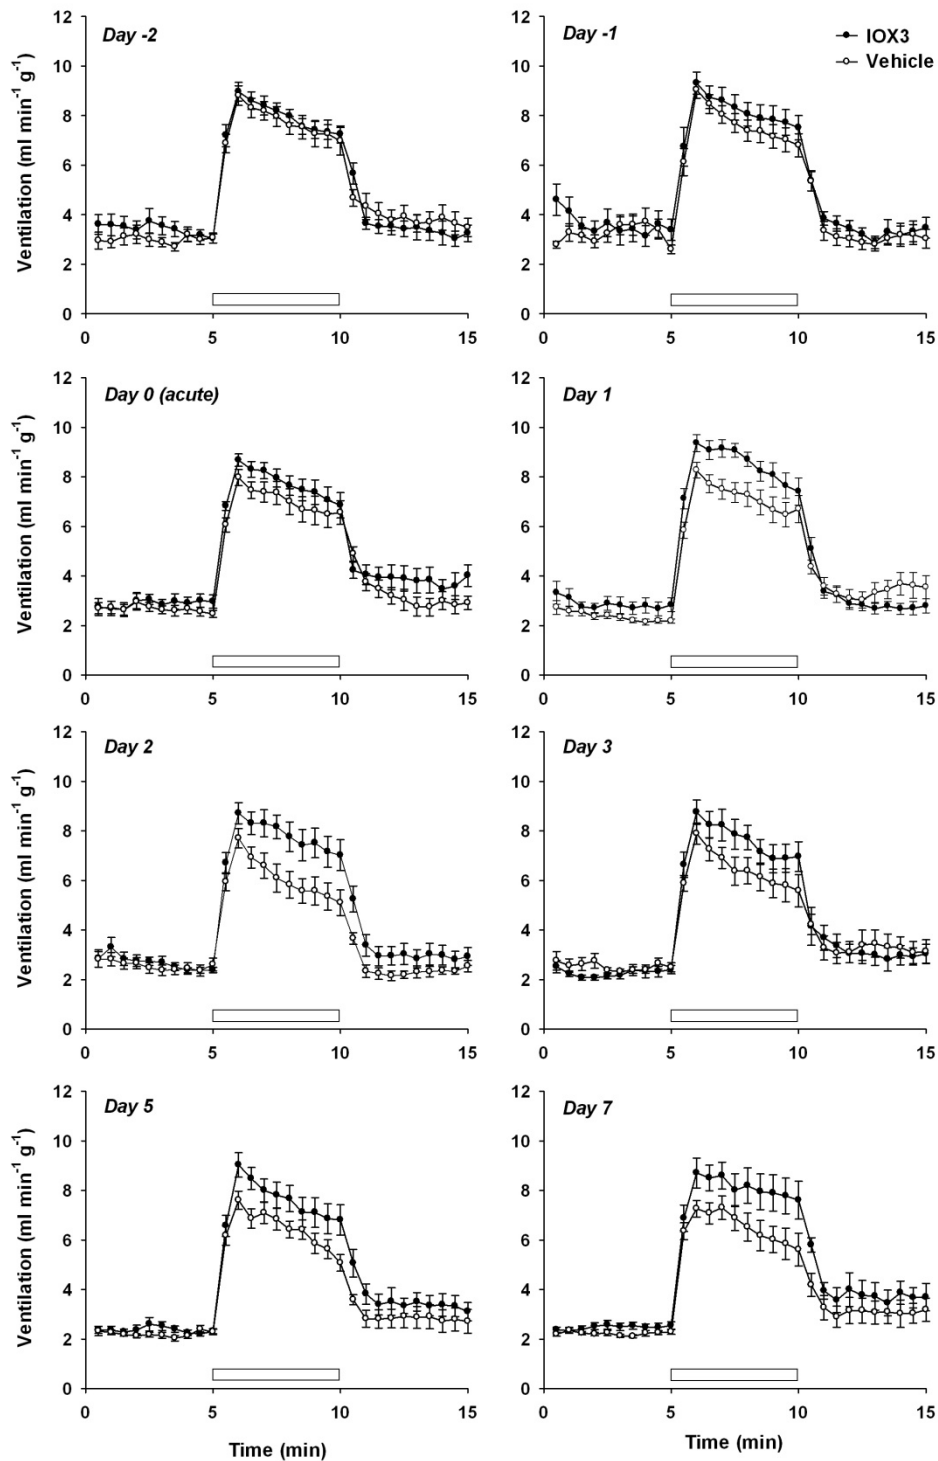

**Supplementary figure 2: Effect of pharmacological PHD inhibition on ventilatory responses to acute hypoxia.** Baseline responses were measured before IOX3 administration (days -1 and -2), within 90 min of the first dose of IOX3 (day 0) and on days 1, 2, 3, 5 and 7 after the onset of intraperitoneal administration of IOX3 at a dose of 30 mg kg<sup>-1</sup> twice daily, or vehicle control. On each day of study, mice breathed air within the chamber for at least 30 min before measurements; baseline ventilation was then measured over the next 5 min. Mice were then exposed to 5 min of 10% oxygen with 3% carbon dioxide (open bar), before returning to breathing air for a further 5 min. Values are mean  $\pm$  S.E.M.; n = 11 C57BL/6 animals in each group.

### Baseline ventilation

|                                                            | Pre-treatment (day -1) |            | Post-treatment (day 7) |            |
|------------------------------------------------------------|------------------------|------------|------------------------|------------|
|                                                            | Hypoxia                | Normoxia   | Hypoxia                | Normoxia   |
| Minute ventilation (ml min <sup>-1</sup> g <sup>-1</sup> ) | 4.3 ± 0.4              | 4.8 ± 0.5  | 5.8 ± 0.3**            | 3.7 ± 0.3  |
| Tidal volume (μl g <sup>-1</sup> )                         | 15.0 ± 0.8             | 15.8 ± 0.9 | 15.9 ± 0.5             | 14.1 ± 1.0 |
| Respiratory rate (breaths min <sup>-1</sup> )              | 278 ± 23               | 253 ± 18   | 373 ± 17**             | 275 ± 17   |

### Hypoxic ventilatory response (HVR) to 10% oxygen

|                                                            | Pre-treatment HVR (day -1) |           | Post-treatment HVR (day 7) |           | Change in HVR |           |
|------------------------------------------------------------|----------------------------|-----------|----------------------------|-----------|---------------|-----------|
|                                                            | Hypoxia                    | Normoxia  | Hypoxia                    | Normoxia  | Hypoxia       | Normoxia  |
| Minute ventilation (ml min <sup>-1</sup> g <sup>-1</sup> ) | 1.0 ± 0.5                  | 1.0 ± 0.5 | 4.0 ± 0.3**                | 1.7 ± 0.4 | 3.0 ± 0.5**   | 0.7 ± 0.6 |
| Tidal volume (μl g <sup>-1</sup> )                         | 3.5 ± 0.9                  | 4.0 ± 0.8 | 8.0 ± 0.8*                 | 5.1 ± 0.7 | 4.5 ± 1.3*    | 1.1 ± 0.7 |
| Respiratory rate (breaths min <sup>-1</sup> )              | 15 ± 16                    | 29 ± 34   | 38 ± 22                    | 8 ± 34    | 23 ± 34       | -20 ± 45  |

### Hypoxic ventilatory response (HVR) to 10% oxygen, 3% carbon dioxide

|                                                            | Pre-treatment HVR (day -1) |            | Post-treatment HVR (day 7) |            | Change in HVR |            |
|------------------------------------------------------------|----------------------------|------------|----------------------------|------------|---------------|------------|
|                                                            | Hypoxia                    | Normoxia   | Hypoxia                    | Normoxia   | Hypoxia       | Normoxia   |
| Minute ventilation (ml min <sup>-1</sup> g <sup>-1</sup> ) | 5.5 ± 0.4                  | 4.5 ± 0.7  | 10.8 ± 0.3**               | 4.1 ± 0.7  | 5.3 ± 0.7**   | -0.3 ± 0.9 |
| Tidal volume (μl g <sup>-1</sup> )                         | 12.0 ± 1.0                 | 11.0 ± 1.0 | 20.6 ± 1.1**               | 10.9 ± 1.7 | 8.6 ± 1.1**   | -0.2 ± 2.0 |
| Respiratory rate (breaths min <sup>-1</sup> )              | 84 ± 38                    | 47 ± 35    | 138 ± 12*                  | 43 ± 31    | 54 ± 41       | -5 ± 37    |

**Supplementary table 1: Effect of chronic hypoxia on hypoxic ventilatory response (HVR).** Tidal volume and respiratory rate were measured in awake animals using individual whole body plethysmographs. Baseline ventilation and HVR was measured before (day -1) and after (day 7) exposure to 7 days of 10% oxygen or room air (normoxia). On each day of study, mice breathed air within the chamber for at least 30 min before measurements; baseline ventilation was then measured over the next 5 min, before mice were exposed to 5 min of 10% oxygen, with or without the addition of 3% carbon dioxide. HVR is the difference between the relevant ventilatory parameter (minute ventilation, tidal volume or respiratory rate) during the 1 min prior to onset of hypoxia and the first 1 min of stable hypoxia (i.e. excluding the first 30 seconds after switching to hypoxic gas delivery). Values are mean ± S.E.M.; n = 8 C57BL/6 animals in each group. Comparisons between chronic hypoxia and normoxic control group were made with unpaired *t*-tests \**p*<0.05, \*\**p*<0.01.

## Baseline ventilation

|                                                            | <i>PHDI</i> <sup>-/-</sup> | Wild-type  | <i>PHD2</i> <sup>+/-</sup> | Wild-type  | <i>PHD3</i> <sup>-/-</sup> | Wild-type  |
|------------------------------------------------------------|----------------------------|------------|----------------------------|------------|----------------------------|------------|
| Minute ventilation (ml min <sup>-1</sup> g <sup>-1</sup> ) | 3.6 ± 0.4                  | 3.1 ± 0.2  | 5.4 ± 0.6                  | 4.7 ± 0.4  | 2.9 ± 0.4                  | 3.8 ± 0.4  |
| Tidal volume (μl g <sup>-1</sup> )                         | 12.6 ± 0.5                 | 12.1 ± 0.7 | 16.2 ± 1.1                 | 13.7 ± 0.7 | 13.1 ± 1.2                 | 12.8 ± 0.6 |
| Respiratory rate (breaths min <sup>-1</sup> )              | 300 ± 38                   | 275 ± 15   | 341 ± 41                   | 359 ± 30   | 227 ± 18                   | 317 ± 44   |

## Hypoxic ventilatory response (HVR) to 10% oxygen

|                                                            | <i>PHDI</i> <sup>-/-</sup> | Wild-type | <i>PHD2</i> <sup>+/-</sup> | Wild-type | <i>PHD3</i> <sup>-/-</sup> | Wild-type |
|------------------------------------------------------------|----------------------------|-----------|----------------------------|-----------|----------------------------|-----------|
| Minute ventilation (ml min <sup>-1</sup> g <sup>-1</sup> ) | –                          | –         | 2.7 ± 0.7                  | 1.3 ± 0.5 | –                          | –         |
| Tidal volume (μl g <sup>-1</sup> )                         | –                          | –         | 6.7 ± 0.8                  | 5.3 ± 0.6 | –                          | –         |
| Respiratory rate (breaths min <sup>-1</sup> )              | –                          | –         | 11 ± 35                    | -35 ± 38  | –                          | –         |

## Hypoxic ventilatory response (HVR) to 10% oxygen, 3% carbon dioxide

|                                                            | <i>PHDI</i> <sup>-/-</sup> | Wild-type  | <i>PHD2</i> <sup>+/-</sup> | Wild-type  | <i>PHD3</i> <sup>-/-</sup> | Wild-type |
|------------------------------------------------------------|----------------------------|------------|----------------------------|------------|----------------------------|-----------|
| Minute ventilation (ml min <sup>-1</sup> g <sup>-1</sup> ) | 4.9 ± 0.3                  | 4.2 ± 0.4  | 8.4 ± 0.7**                | 5.0 ± 0.8  | 3.1 ± 0.6                  | 3.8 ± 0.7 |
| Tidal volume (μl g <sup>-1</sup> )                         | 10.3 ± 0.6                 | 10.6 ± 0.9 | 18.8 ± 1.3*                | 12.9 ± 2.0 | 6.4 ± 1.0                  | 9.0 ± 0.9 |
| Respiratory rate (breaths min <sup>-1</sup> )              | 140 ± 6*                   | 58 ± 29    | 97 ± 45                    | 47 ± 42    | 79 ± 44                    | 36 ± 47   |

**Supplementary table 2: Effect of genetic PHD deficiency on hypoxic ventilatory response (HVR).** Tidal volume and respiratory rate were measured in awake animals using individual whole body plethysmographs. Mice breathed air within the chamber for at least 30 min before measurements; baseline ventilation was then measured over the next 5 min, before mice were exposed to 5 min of 10% oxygen, or 10% oxygen with 3% carbon dioxide. HVR is the difference between the relevant ventilatory parameter (minute ventilation, tidal volume or respiratory rate) during the 1 min prior to onset of hypoxia and the first 1 min of stable hypoxia (i.e. excluding the first 30 seconds after switching to hypoxic gas delivery). Values are mean ± S.E.M.; n = 5-7 littermate pairs in each group. *PHD2*<sup>+/-</sup> mice were on a pure C57BL/6 genetic background. *PHDI*<sup>-/-</sup> and *PHD3*<sup>-/-</sup> mice were on a mixed Swiss/129SvEv background. Comparisons between *PHD*-deficient and wild-type groups were made with unpaired *t*-tests \**p*<0.05, \*\**p*<0.01.

### Baseline ventilation

|                                                            | Pre-treatment (day -1) |            | Post-treatment (day 7) |              |
|------------------------------------------------------------|------------------------|------------|------------------------|--------------|
|                                                            | Hypoxia                | Normoxia   | Hypoxia                | Normoxia     |
| Minute ventilation (ml min <sup>-1</sup> g <sup>-1</sup> ) | 5.9 ± 0.3              | 5.7 ± 0.5  | 5.7 ± 0.2              | 4.8 ± 0.4    |
| Tidal volume (μl g <sup>-1</sup> )                         | 15.3 ± 0.3             | 14.9 ± 0.4 | 17.4 ± 0.1             | 15.2 ± 0.6** |
| Respiratory rate (breaths min <sup>-1</sup> )              | 400 ± 16               | 395 ± 33   | 326 ± 13               | 329 ± 26     |

### Hypoxic ventilatory response (HVR) to 10% oxygen

|                                                            | Pre-treatment HVR (day -1) |           | Post-treatment HVR (day 7) |           | Change in HVR |            |
|------------------------------------------------------------|----------------------------|-----------|----------------------------|-----------|---------------|------------|
|                                                            | Hypoxia                    | Normoxia  | Hypoxia                    | Normoxia  | Hypoxia       | Normoxia   |
| Minute ventilation (ml min <sup>-1</sup> g <sup>-1</sup> ) | 2.0 ± 1.0                  | 2.2 ± 1.1 | 3.2 ± 0.8                  | 1.7 ± 0.5 | 1.2 ± 0.8     | -0.5 ± 0.8 |
| Tidal volume (μl g <sup>-1</sup> )                         | 6.7 ± 0.6                  | 7.1 ± 1.0 | 5.2 ± 0.8                  | 5.9 ± 0.6 | -1.5 ± 0.5    | -1.2 ± 0.8 |
| Respiratory rate (breaths min <sup>-1</sup> )              | -33 ± 58                   | -15 ± 53  | 68 ± 35                    | -38 ± 28* | 101 ± 54      | -22 ± 66   |

### Hypoxic ventilatory response (HVR) to 10% oxygen, 3% carbon dioxide

|                                                            | Pre-treatment HVR (day -1) |            | Post-treatment HVR (day 7) |            | Change in HVR |            |
|------------------------------------------------------------|----------------------------|------------|----------------------------|------------|---------------|------------|
|                                                            | Hypoxia                    | Normoxia   | Hypoxia                    | Normoxia   | Hypoxia       | Normoxia   |
| Minute ventilation (ml min <sup>-1</sup> g <sup>-1</sup> ) | 7.9 ± 0.6                  | 8.3 ± 0.8  | 8.3 ± 0.6                  | 6.6 ± 0.7  | 0.4 ± 0.8     | -1.7 ± 1.0 |
| Tidal volume (μl g <sup>-1</sup> )                         | 17.7 ± 0.9                 | 19.1 ± 1.1 | 17.0 ± 0.4                 | 16.9 ± 1.2 | -0.7 ± 1.2    | -2.2 ± 1.6 |
| Respiratory rate (breaths min <sup>-1</sup> )              | 66 ± 30                    | 98 ± 44    | 67 ± 33                    | 45 ± 39    | 1 ± 47        | -52 ± 65   |

**Supplementary table 3: Effect of chronic hypoxia on hypoxic ventilatory response (HVR) in PHD2 deficient animals.** Tidal volume and respiratory rate were measured in awake *PHD2*<sup>+/±</sup> animals using individual whole body plethysmographs. Baseline ventilation and HVR were measured before (day -1) and after (day 7) exposure to 7 days of 10% oxygen or room air (normoxia). On each day of study, mice breathed air within the chamber for at least 30 min before measurements; baseline ventilation was then measured over the next 5 min, before mice were exposed to 5 min of 10% oxygen, with or without the addition of 3% carbon dioxide. HVR is the difference between the relevant ventilatory parameter (minute ventilation, tidal volume or respiratory rate) during the 1 min prior to onset of hypoxia and the first 1 min of stable hypoxia (i.e. excluding the first 30 seconds after switching to hypoxic gas delivery). Values are mean ± S.E.M.; n = 5 C57BL/6 animals in each group. Comparisons between chronic hypoxia and normoxic control group were made with unpaired *t*-tests \**p*<0.05, \*\**p*<0.01.

## Baseline ventilation

|                                                            | Pre-treatment (day -1) |            | Post-treatment (day 0) |            | Post-treatment (day 7) |            |
|------------------------------------------------------------|------------------------|------------|------------------------|------------|------------------------|------------|
|                                                            | IOX3                   | Vehicle    | IOX3                   | Vehicle    | IOX3                   | Vehicle    |
| Minute ventilation (ml min <sup>-1</sup> g <sup>-1</sup> ) | 4.5 ± 0.5              | 3.8 ± 0.3  | 3.6 ± 0.3              | 2.8 ± 0.2  | 3.0 ± 0.3              | 3.0 ± 0.3  |
| Tidal volume (μl g <sup>-1</sup> )                         | 12.7 ± 0.5             | 12.5 ± 0.5 | 12.2 ± 0.3             | 11.5 ± 0.5 | 12.0 ± 0.4             | 11.4 ± 0.3 |
| Respiratory rate (breaths min <sup>-1</sup> )              | 358 ± 37               | 317 ± 23   | 302 ± 23               | 251 ± 20   | 252 ± 21               | 271 ± 26   |

## Day 0: Hypoxic ventilatory response (HVR) to 10% oxygen, 3% carbon dioxide

|                                                            | Pre-treatment HVR (day -1) |            | Post-treatment HVR (day 0) |            | Change in HVR |            |
|------------------------------------------------------------|----------------------------|------------|----------------------------|------------|---------------|------------|
|                                                            | IOX3                       | Vehicle    | IOX3                       | Vehicle    | IOX3          | Vehicle    |
| Minute ventilation (ml min <sup>-1</sup> g <sup>-1</sup> ) | 5.5 ± 0.4                  | 5.7 ± 0.3  | 5.5 ± 0.4                  | 5.2 ± 0.3  | 0.0 ± 0.7     | -0.5 ± 0.4 |
| Tidal volume (μl g <sup>-1</sup> )                         | 13.5 ± 0.9                 | 13.5 ± 1.0 | 13.4 ± 1.1                 | 12.3 ± 1.2 | -0.1 ± 1.1    | -1.2 ± 1.2 |
| Respiratory rate (breaths min <sup>-1</sup> )              | 68 ± 30                    | 96 ± 15    | 83 ± 22                    | 100 ± 19   | 15 ± 45       | 5 ± 18     |

## Day 7: Hypoxic ventilatory response (HVR) to 10% oxygen, 3% carbon dioxide

|                                                            | Pre-treatment HVR (day -1) |            | Post-treatment HVR (day 7) |            | Change in HVR |            |
|------------------------------------------------------------|----------------------------|------------|----------------------------|------------|---------------|------------|
|                                                            | IOX3                       | Vehicle    | IOX3                       | Vehicle    | IOX3          | Vehicle    |
| Minute ventilation (ml min <sup>-1</sup> g <sup>-1</sup> ) | 5.5 ± 0.4                  | 5.7 ± 0.3  | 6.1 ± 0.6                  | 4.9 ± 0.3  | 0.6 ± 0.5*    | -0.9 ± 0.3 |
| Tidal volume (μl g <sup>-1</sup> )                         | 13.5 ± 0.9                 | 13.5 ± 1.0 | 13.5 ± 1.1                 | 11.2 ± 0.9 | 0.0 ± 0.7*    | -2.3 ± 0.7 |
| Respiratory rate (breaths min <sup>-1</sup> )              | 68 ± 30                    | 96 ± 15    | 129 ± 14                   | 115 ± 9    | 61 ± 35       | 19 ± 15    |

**Supplementary table 4: Effect of pharmacological PHD inhibition on hypoxic ventilatory response (HVR).** Tidal volume and respiratory rate were measured in awake animals using individual whole body plethysmographs. Baseline ventilation and HVR were measured before administration of the PHD inhibitor IOX3 (day -1), within 90 min of the first dose of IOX3 (day 0) and after 7 days of intraperitoneal IOX3 at a dose of 30 mg kg<sup>-1</sup> twice daily, or vehicle control. On each day of study, mice breathed air within the chamber for at least 30 min before measurements; baseline ventilation was then measured over the next 5 min before mice were exposed to 5 min of 10% oxygen with 3% carbon dioxide. HVR is the difference between the relevant ventilatory parameter (minute ventilation, tidal volume or respiratory rate) during the 1 min prior to onset of hypoxia and the first 1 min of stable hypoxia (i.e. excluding the first 30 seconds after the switch to hypoxic gas delivery). Values are mean ± S.E.M.; n = 11 C57BL/6 animals in each group. Comparisons between IOX3 and vehicle-treated groups were made with unpaired *t*-tests \**p*<0.05, \*\**p*<0.01.
